# Supplementary material for: A transformation from temporal to ensemble coding in a model of piriform cortex
Source: eLife journal article supplement (doi:10.7554/elife.34831), 2018-03-29
Supplement: supp [file elife-34831-supp-v1.zip]

Archive with 4 entries (4 files):
- elife_poa_e34831_Source_code_2.zip
- elife_poa_e34831_Transparent_Reporting_File.pdf
- elife_poa_e34831_Source_code_1.rtf
- elife_poa_e34831_Figure_5_figure_supplement_1.pdf
