# Supplementary material for: A transformation from temporal to ensemble coding in a model of piriform cortex
Source: eLife journal article supplement (doi:10.7554/elife.34831), 2018-03-29
Supplement: supp [file elife-34831-supp-v1.zip › elife_poa_e34831_Figure_5_figure_supplement_1.pdf]

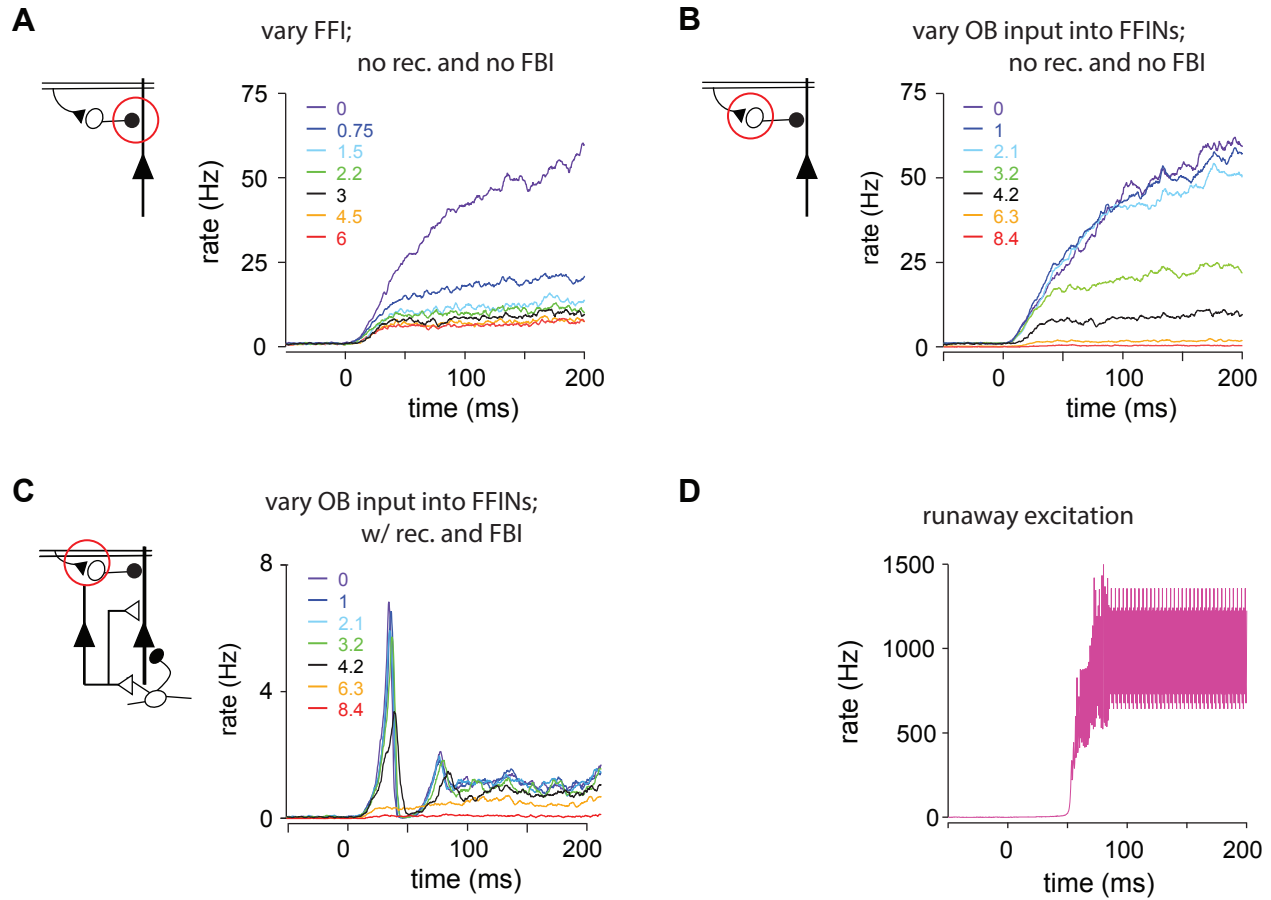

Figure 5 - supplemental figure 1:  
 FFI shape the response in partial circuit;  
 OB input onto FFINs shape the response in partial and full circuit;  
 Runaway excitation (example).
